# Supplementary material for: Serum pharmacodynamic biomarkers for chronic corticosteroid treatment of children
Source: PubMed Central journal article supplement (PMC4987691; doi:10.1038/srep31727), 2016-08-17
Supplement: srep31727-s1.pdf [file srep31727-s1.pdf]

## **Supplemental materials**

### **Serum pharmacodynamic biomarkers for chronic corticosteroid treatment of children**

Yetrib Hathout<sup>1\*</sup>, Laurie Conklin<sup>1</sup>, Haeri Seol<sup>1</sup>, Heather Gordish-Dressman<sup>1</sup>, Kristy J Brown<sup>1</sup>, Lauren P Morgenroth<sup>1</sup>, Kanneboyina Nagaraju<sup>1</sup>, Christopher R Heier<sup>1</sup>, Jesse M Damsker<sup>1</sup>, John N. van den Anker<sup>1</sup>, Erik Henricson<sup>2</sup>, Paula R Clemens<sup>3</sup>, Jean K Mah<sup>4</sup>, Craig McDonald<sup>2</sup> and Eric P Hoffman<sup>1</sup>.

<sup>1</sup>Research Center for Genetic Medicine, Children's National Health Systems, Washington, DC 20010, USA.

<sup>2</sup>Department of Physical Medicine & Rehabilitation, University of California, Davis School of Medicine, Davis, CA 95618, USA

<sup>3</sup>Neurology Service, Department of Veterans Affairs Medical Center, Pittsburgh, PA and the Department of Neurology, University of Pittsburgh, Pittsburgh, PA

<sup>4</sup>Department of Pediatrics, Alberta Children's Hospital, Calgary, AB, Canada T3B 6A8

**Supplemental Table S1: demographic of DMD patients and healthy controls used in this study**

| ID                           | Age  | CS treatment | Length on CS (in weeks) | Additional medication                        |
|------------------------------|------|--------------|-------------------------|----------------------------------------------|
| <b>Healthy control group</b> |      |              |                         |                                              |
| CNT                          | 6    | NA           | NA                      | none                                         |
| CNT                          | 7.02 | NA           | NA                      | none                                         |
| CNT                          | 10.3 | NA           | NA                      | none                                         |
| CNT                          | 8.0  | NA           | NA                      | none                                         |
| CNT                          | 8.4  | NA           | NA                      | none                                         |
| CNT                          | 9.35 | NA           | NA                      | none                                         |
| <b>Cross-sectional group</b> |      |              |                         |                                              |
| DMD-1 naïve                  | 4.00 | No           | NA                      | vitamin D                                    |
| DMD-2 naïve                  | 4.30 | No           | NA                      | vitamin D                                    |
| DMD-3 naïve                  | 4.40 | No           | NA                      | vitamin D/Coenzyme Q10/Albuterol/Zyrtec      |
| DMD-4 naïve                  | 4.40 | No           | NA                      | Acetaminophen/Neurontin                      |
| DMD-5 naïve                  | 4.90 | No           | NA                      | none                                         |
| DMD-6 naïve                  | 5.60 | No           | NA                      | none                                         |
| DMD-7 naïve                  | 6.80 | No           | NA                      | vitamin D/calcium                            |
| DMD-8 naïve                  | 8.00 | No           | NA                      | Vitamin D/Calcium/Minerals                   |
| DMD-9 naïve                  | 9.20 | No           | NA                      | Vitamin D/Calcium/Acetaminophen              |
| DMD-10 + GC                  | 4.30 | Yes          | 6                       | multivitamins                                |
| DMD-11 + GC                  | 5.60 | Yes          | 12                      | vitamin D                                    |
| DMD-12 + GC                  | 7.40 | Yes          | 12                      | vitamin D                                    |
| DMD-13 + GC                  | 9.50 | Yes          | 18                      | vitamin D/calcium                            |
| DMD-14 + GC                  | 9.60 | Yes          | 18                      | vitamin D                                    |
| <b>Longitudinal group</b>    |      |              |                         |                                              |
| DMD patient 1                | 7.8  | No           | 0                       | vitamin D                                    |
| DMD patient 1                | 8.13 | Yes          | 6                       | vitamin D/fish oil                           |
| DMD patient 1                | 8.38 | Yes          | 9                       | vitamin D/fish oil                           |
| DMD patient 1                | 8.61 | Yes          | 12                      | vitamin D/multivitamins                      |
| DMD patient 1                | 9.15 | Yes          | 18                      | vitamin D/multivitamins/ Albuterol/Idebenone |
| DMD patient 2                | 6.3  | No           | 0                       | none                                         |
| DMD patient 2                | 6.53 | Yes          | 3                       | multivitamins                                |
| DMD patient 2                | 6.79 | Yes          | 6                       | vitamin D/multivitamins                      |

|               |      |     |    |                                                      |
|---------------|------|-----|----|------------------------------------------------------|
| DMD patient 2 | 7.02 | Yes | 9  | vitamin D/multivitamins                              |
| DMD patient 2 | 7.29 | Yes | 12 | vitamin D/multivitamins                              |
| DMD patient 3 | 4.9  | No  | 0  | none                                                 |
| DMD patient 3 | 5.4  | No  | 0  | none                                                 |
| DMD patient 3 | 5.95 | Yes | 12 | Acetaminophen                                        |
| DMD patient 3 | 6.35 | Yes | 18 | vitamin D/Non-steroidal anti-inflammatory medication |
| DMD patient 4 | 5.7  | No  | 0  | none                                                 |
| DMD patient 4 | 5.8  | No  | 0  | none                                                 |
| DMD patient 4 | 6.8  | No  | 0  | vitamin D                                            |
| DMD patient 5 | 5.8  | No  | 0  | vitamin D/Amoxicillin                                |
| DMD patient 5 | 6.48 | Yes | 6  | vitamin D                                            |
| DMD patient 6 | 4.27 | No  | 0  | vitamin D/Calcium                                    |
| DMD patient 6 | 4.30 | No  | 0  | vitamin D/Calcium                                    |
| DMD patient 6 | 4.96 | Yes | 12 | vitamin D                                            |
| DMD patient 6 | 5.53 | Yes | 18 | vitamin D                                            |
| DMD patient 7 | 5.4  | No  | 0  | vitamin D/calcium                                    |
| DMD patient 7 | 6.2  | No  | 9  | vitamin D/Calcium                                    |
| DMD patient 7 | 6.92 | Yes | 12 | vitamin D                                            |
| DDM patient 8 | 5.0  | No  | 0  | vitamin D                                            |
| DMD patient 8 | 5.81 | Yes | 12 | vitamin D                                            |
| DMD patient 8 | 6.25 | Yes | 18 | vitamin D                                            |
| DMD patient 9 | 7.7  | No  | 0  | vitamin D                                            |
| DMD patient 9 | 8.36 | Yes | 9  | vitamin D                                            |
| DMD patient 9 | 8.74 | Yes | 12 | vitamin D/Calcium                                    |

**Supplemental Table S2: Demographic of pre and post glucocorticoids treated IBD patients**

| <b>Patient ID</b> | <b>Age</b> | <b>Gender</b> | <b>Length on CS treatment (in weeks)</b> | <b>other medications</b>                                |
|-------------------|------------|---------------|------------------------------------------|---------------------------------------------------------|
| 3                 | 12         | F             | 11                                       | none                                                    |
| 4                 | 11         | M             | 12                                       | mesalamine                                              |
| 17                | 9          | M             | 15                                       | mesalamine, lansoprazole                                |
| 26                | 9          | M             | 5                                        | mesalamine                                              |
| 27                | 10         | M             | 6                                        | mesalamine, lansoprazole                                |
| 33                | 13         | M             | 5                                        | 6MP, mesalamine, lansoprazole                           |
| 54                | 12         | M             | 10                                       | mesalamine, lansoprazole                                |
| 92                | 10         | F             | 8                                        | mesalamine                                              |
| 108               | 15         | F             | 12                                       | omeprazole, 6MP, mesalamine, propranolol, amytryptiline |
| 21                | 15         | F             | 3                                        | mesalamine, lansoprazole                                |
| 28                | 15         | F             | 18                                       | mesalamine, lansoprazole                                |
